# Supplementary material
Source: ML conference proceedings conference paper supplement (https://openaccess.thecvf.com/content/CVPR_2019/html/Li_Understanding_the_Disharmony_CVPR_2019_paper.html)
Supplement: Supplementary file 1 [file Li_Understanding_the_Disharmony_CVPR_2019_supplemental.pdf]

# Supplementary Materials for “Understanding the Disharmony between Dropout and Batch Normalization by Variance Shift”

## A. Details of formulas in Section 3.2 (paper)

In this section, we list the detailed deductions of formulas especially in Section 3.2 (paper). Firstly,  $Var^{Train}(X)$  is expanded as:

$$\begin{aligned}
 Var^{Train}(X) &= Cov\left(\sum_{i=1}^d w_i a_i \frac{1}{p} x_i, \sum_{i=1}^d w_i a_i \frac{1}{p} x_i\right) \\
 &= \frac{1}{p^2} \sum_{i=1}^d (w_i)^2 Var(a_i x_i) \\
 &+ \frac{1}{p^2} \sum_{i=1}^d \sum_{j \neq i}^d \rho_{i,j}^{ax} w_i w_j \sqrt{Var(a_i x_i)} \sqrt{Var(a_j x_j)} \\
 &= \left(\frac{1}{p}(c^2 + v) - c^2\right) \left(\sum_{i=1}^d w_i^2 + \rho^{ax} \sum_{i=1}^d \sum_{j \neq i}^d w_i w_j\right),
 \end{aligned} \tag{1}$$

and  $Var^{Test}(X)$  is obtained:

$$\begin{aligned}
 Var^{Test}(X) &= Var\left(\sum_{i=1}^d w_i x_i\right) \\
 &= Cov\left(\sum_{i=1}^d w_i x_i, \sum_{i=1}^d w_i x_i\right) = \sum_{i=1}^d w_i^2 Var(x_i) \\
 &+ \sum_{i=1}^d \sum_{j \neq i}^d \rho_{i,j}^x w_i w_j \sqrt{Var(x_i)} \sqrt{Var(x_j)} \\
 &= v \left(\sum_{i=1}^d w_i^2 + \rho^x \sum_{i=1}^d \sum_{j \neq i}^d w_i w_j\right).
 \end{aligned} \tag{2}$$

Further we can get the relation between  $\rho^{ax}$  and  $\rho^x$ :

$$\begin{aligned}
 \rho^{ax} = \rho_{i,j}^{ax} &= \frac{Cov(a_i x_i, a_j x_j)}{\sqrt{Var(a_i x_i)} \sqrt{Var(a_j x_j)}} \\
 &= \frac{p^2 Cov(x_i, x_j)}{\frac{p(c^2+v) - p^2 c^2}{v} \sqrt{Var(x_i)} \sqrt{Var(x_j)}} \\
 &= \frac{v}{\frac{1}{p}(c^2 + v) - c^2} \rho_{i,j}^x = \frac{v}{\frac{1}{p}(c^2 + v) - c^2} \rho^x.
 \end{aligned} \tag{3}$$

According to the above equations, the variance shift for

case (b) can be written as:

$$\begin{aligned}
 \Delta(p, d) &= \frac{Var^{Test}(X)}{Var^{Train}(X)} \\
 &= \frac{v(\sum_{i=1}^d w_i^2 + \rho^x \sum_{i=1}^d \sum_{j \neq i}^d w_i w_j)}{\left(\frac{1}{p}(c^2 + v) - c^2\right) \left(\sum_{i=1}^d w_i^2 + \rho^{ax} \sum_{i=1}^d \sum_{j \neq i}^d w_i w_j\right)} \\
 &= \frac{v \sum_{i=1}^d w_i^2 + v \rho^x \sum_{i=1}^d \sum_{j \neq i}^d w_i w_j}{\left(\frac{1}{p}(c^2 + v) - c^2\right) \sum_{i=1}^d w_i^2 + v \rho^x \sum_{i=1}^d \sum_{j \neq i}^d w_i w_j} \\
 &= \frac{v + v \rho^x (d(\cos \theta)^2 - 1)}{\frac{1}{p}(c^2 + v) - c^2 + v \rho^x (d(\cos \theta)^2 - 1)},
 \end{aligned} \tag{4}$$
